# Supplementary material
Source: PubMed Central journal article supplement (PMC6283695)
Supplement: NIHMS993148-supplement-Supp_figS1.pdf [file NIHMS993148-supplement-Supp_figS1.pdf]

Compound

Post  
Pre  
Rej

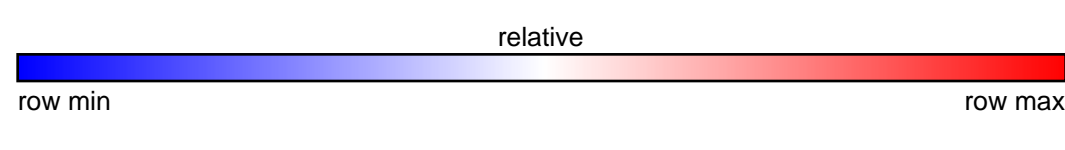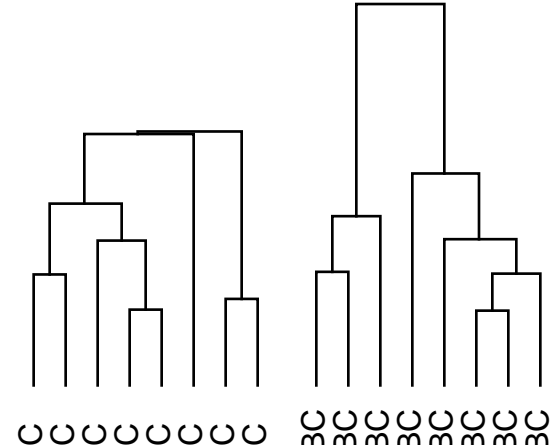

1-2 Pre RBC  
1-3 Pre RBC  
1-1 Pre RBC  
3-1 Pre RBC  
3-2 Pre RBC  
2-1 Pre RBC  
4-1 Pre RBC  
4-2 Pre RBC  
1-2 Post RBC  
3-1 Post RBC  
3-2 Post RBC  
1-1 Post RBC  
1-3 Post RBC  
2-1 Post RBC  
4-1 Post RBC  
4-2 Post RBC  
6.2 Rej RBC

compound

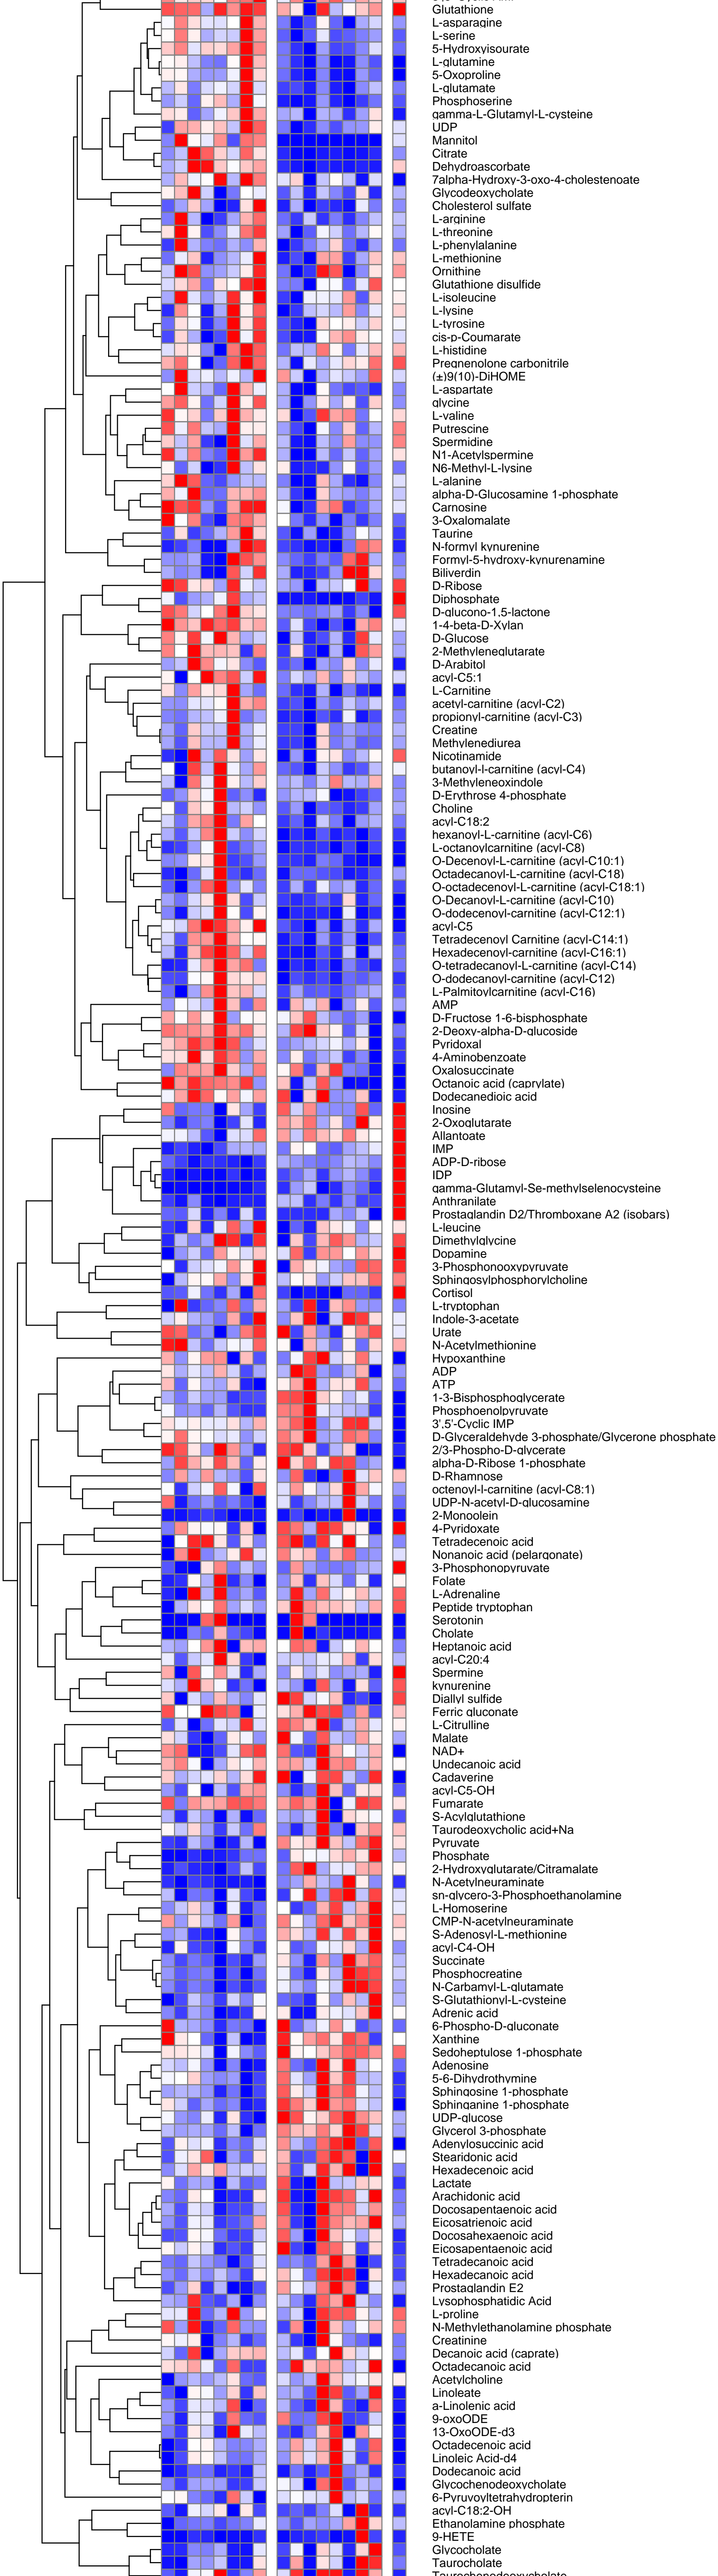

- Annotation
- 3',5'-Cyclic AMP
- Glutathione
- L-asparagine
- L-serine
- 5-Hydroxyisourate
- L-glutamine
- 5-Oxoproline
- L-glutamate
- Phosphoserine
- gamma-L-Glutamyl-L-cysteine
- UDP
- Mannitol
- Citrate
- Dehydroascorbate
- 7alpha-Hydroxy-3-oxo-4-cholestenoate
- Glycodeoxycholate
- Cholesterol sulfate
- L-arginine
- L-threonine
- L-phenylalanine
- L-methionine
- Ornithine
- Glutathione disulfide
- L-isoleucine
- L-lysine
- L-tyrosine
- cis-p-Coumarate
- L-histidine
- Pregnenolone carbonitrile
- (±)9(10)-DiHOME
- L-aspartate
- glycine
- L-valine
- Putrescine
- Spermidine
- N1-Acetylspermine
- N6-Methyl-L-lysine
- L-alanine
- alpha-D-Glucosamine 1-phosphate
- Carnosine
- 3-Oxalomalate
- Taurine
- N-formyl kynurenine
- Formyl-5-hydroxy-kynurenamine
- Biliverdin
- D-Ribose
- Diphosphate
- D-glucono-1,5-lactone
- 1-4-beta-D-Xylan
- D-Glucose
- 2-Methyleneqlutarate
- D-Arabitol
- acvl-C5:1
- L-Carnitine
- acetyl-carnitine (acvl-C2)
- propionyl-carnitine (acvl-C3)
- Creatine
- Methylenediurea
- Nicotinamide
- butanoyl-l-carnitine (acvl-C4)
- 3-Methyleneoxindole
- D-Erythrose 4-phosphate
- Choline
- acvl-C18:2
- hexanoyl-L-carnitine (acvl-C6)
- L-octanoylcarnitine (acvl-C8)
- O-Decenoyl-L-carnitine (acvl-C10:1)
- Octadecanoyl-L-carnitine (acvl-C18)
- O-octadecanoyl-L-carnitine (acvl-C18:1)
- O-Decanoyl-L-carnitine (acvl-C10)
- O-dodecanoyl-carnitine (acvl-C12:1)
- acvl-C5
- Tetradecenoyl Carnitine (acvl-C14:1)
- Hexadecenoyl-carnitine (acvl-C16:1)
- O-tetradecanoyl-L-carnitine (acvl-C14)
- O-dodecanoyl-carnitine (acvl-C12)
- L-Palmitoylcarnitine (acvl-C16)
- AMP
- D-Fructose 1-6-bisphosphate
- 2-Deoxy-alpha-D-glucoside
- Pyridoxal
- 4-Aminobenzoate
- Oxalosuccinate
- Octanoic acid (caprylate)
- Dodecanedioic acid
- Inosine
- 2-Oxoqlutarate
- Allantoate
- IMP
- ADP-D-ribose
- IDP
- gamma-Glutamyl-Se-methylselenocysteine
- Anthranilate
- Prostaqlandin D2/Thromboxane A2 (isobars)
- L-leucine
- Dimethylglycine
- Dopamine
- 3-Phosphonoxyppruvate
- Sphingosylphosphorylcholine
- Cortisol
- L-tryptophan
- Indole-3-acetate
- Urate
- N-Acetylmethionine
- Hypoxanthine
- ADP
- ATP
- 1-3-Bisphosphoglycerate
- Phosphoenolpyruvate
- 3',5'-Cyclic IMP
- D-Glyceraldehyde 3-phosphate/Glycerone phosphate
- 2/3-Phospho-D-glycerate
- alpha-D-Ribose 1-phosphate
- D-Rhamnose
- octenoyl-l-carnitine (acvl-C8:1)
- UDP-N-acetyl-D-glucosamine
- 2-Monoolein
- 4-Pyridoxate
- Tetradecenoic acid
- Nonanoic acid (pelargonate)
- 3-Phosphonopyruvate
- Folate
- L-Adrenaline
- Peptide tryptophan
- Serotonin
- Cholate
- Heptanoic acid
- acvl-C20:4
- Spermine
- kynurenine
- Diallyl sulfide
- Ferric gluconate
- L-Citrulline
- Malate
- NAD+
- Undecanoic acid
- Cadaverine
- acvl-C5-OH
- Fumarate
- S-Acylqlutathione
- Taurodeoxycholic acid+Na
- Pyruvate
- Phosphate
- 2-Hydroxyqlutarate/Citramalate
- N-Acetylneuraminat
- sn-glycerol-3-Phosphoethanolamine
- L-Homoserine
- CMP-N-acetylneuraminat
- S-Adenosyl-L-methionine
- acvl-C4-OH
- Succinate
- Phosphocreatine
- N-Carbamyl-L-qlutamate
- S-Glutathionyl-L-cysteine
- Adrenic acid
- 6-Phospho-D-qluconate
- Xanthine
- Sedoheptulose 1-phosphate
- Adenosine
- 5-6-Dihydrothymine
- Sphingosine 1-phosphate
- Sphingosine 1-phosphate
- UDP-glucose
- Glycerol 3-phosphate
- Adenylosuccinic acid
- Stearidonic acid
- Hexadecenoic acid
- Lactate
- Arachidonic acid
- Docosapentaenoic acid
- Eicosatrienoic acid
- Docosahexaenoic acid
- Eicosapentaenoic acid
- Tetradecanoic acid
- Hexadecanoic acid
- Prostaqlandin E2
- Lysophosphatid Acid
- L-proline
- N-Methylethanolamine phosphate
- Creatinine
- Decanoic acid (caprate)
- Octadecanoic acid
- Acetylcholine
- Linoleate
- a-Linolenic acid
- 9-oxoODE
- 13-OxoODE-d3
- Octadecenoic acid
- Linoleic Acid-d4
- Dodecanoic acid
- Glycochenodeoxycholate
- 6-Pyruvyltetrahydropterin
- acvl-C18:2-OH
- Ethanolamine phosphate
- 9-HETE
- Glycocholate
- Taurocholate
- Taurochenodeoxycholate
