# Supplementary material
Source: PubMed Central journal article supplement (PMC6283695)

Annotation-1  
01-PRE  
02-POST

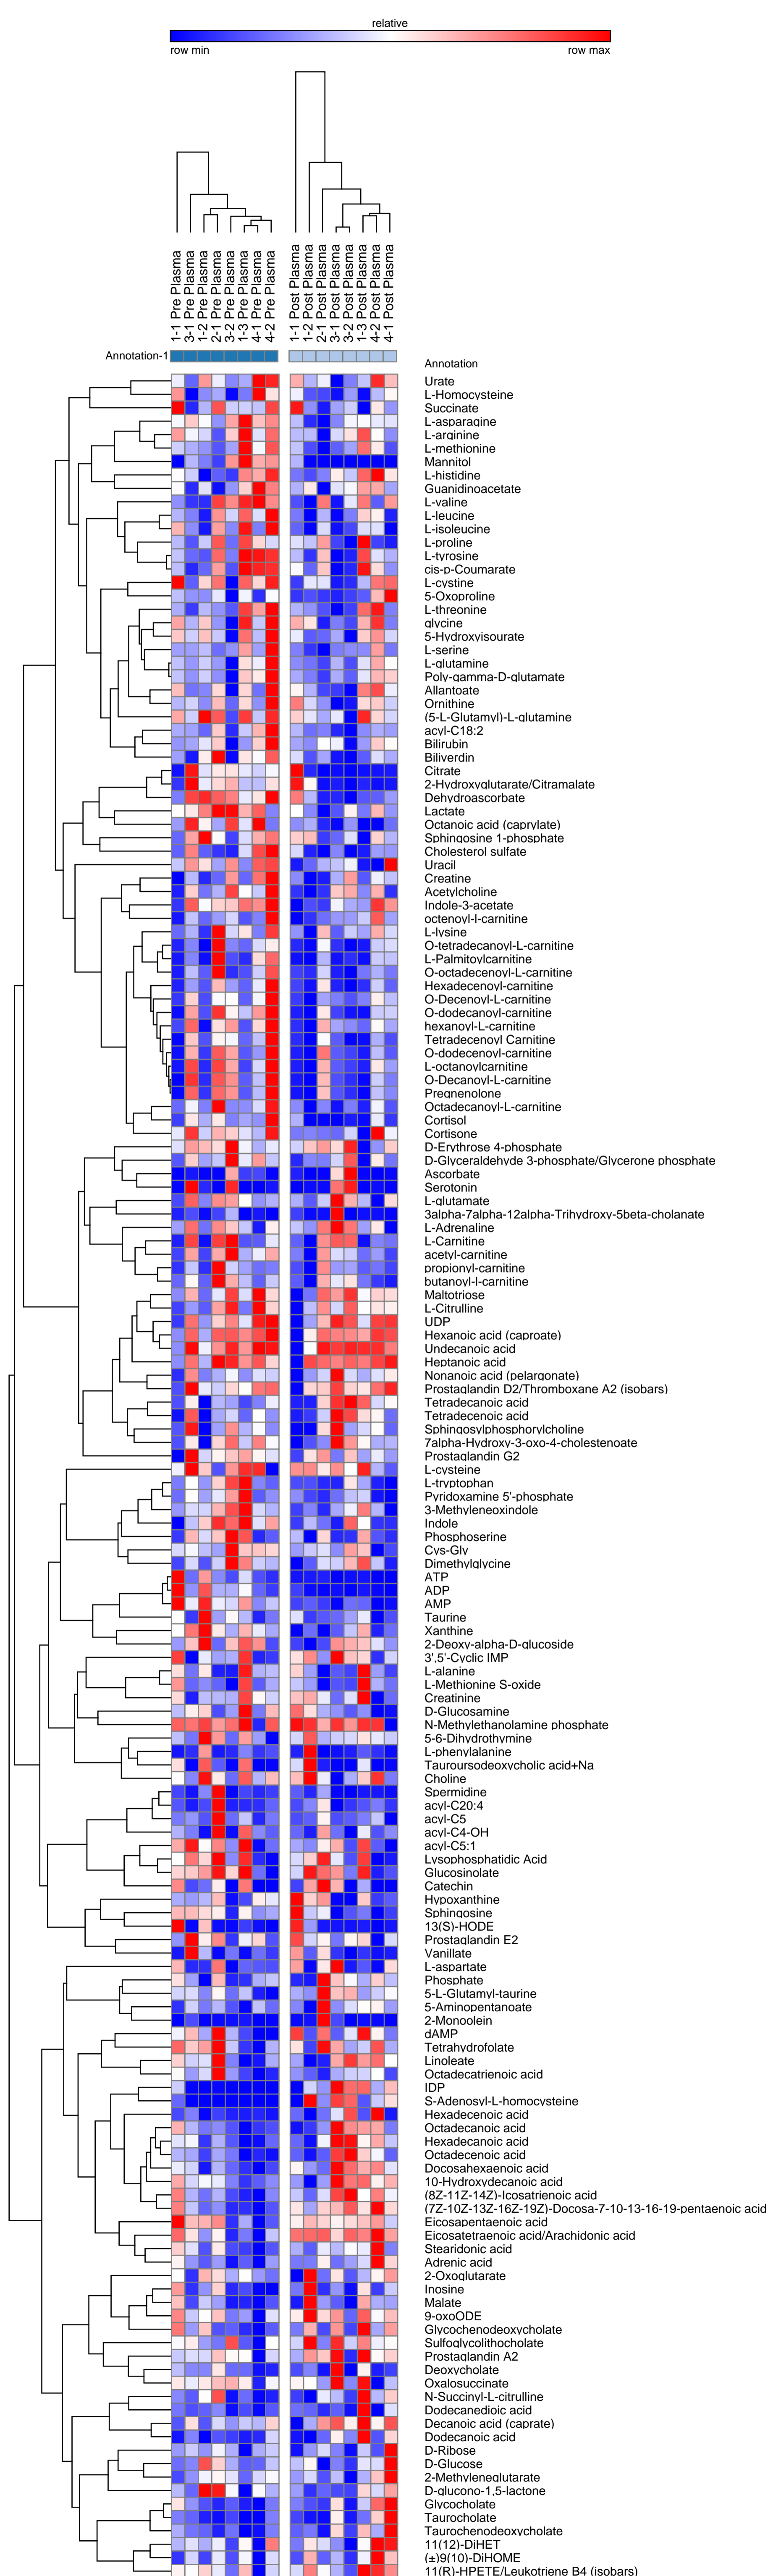

Supplement: NIHMS993148-supplement-Supp_figS2.pdf [file NIHMS993148-supplement-Supp_figS2.pdf]
